# Supplementary material for: Integrated analysis of transcriptome and milk metagenome in subclinical mastitic and healthy cows
Source: PubMed Central journal article supplement (PMC10915226; doi:10.5713/ab.21.0495), 2022-01-21
Supplement: ab-21-0495-Supplementary-Figs.pdf [file ab-21-0495-Supplementary-Figs.pdf]

# Integrative analysis of transcriptome and bovine milk metagenome in subclinical mastitic and healthy cows

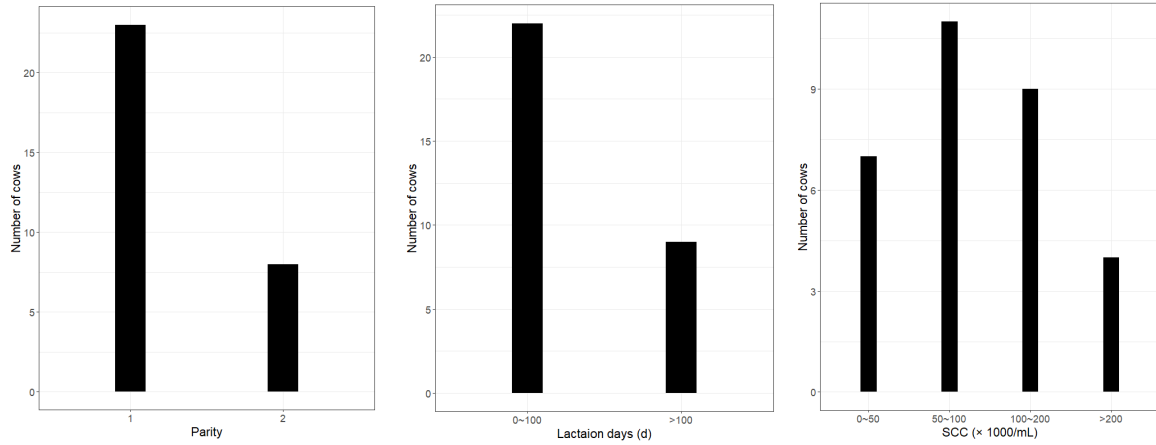

Supplementary Fig.1. Distribution of parity, lactation days and SCC in all 31 cows

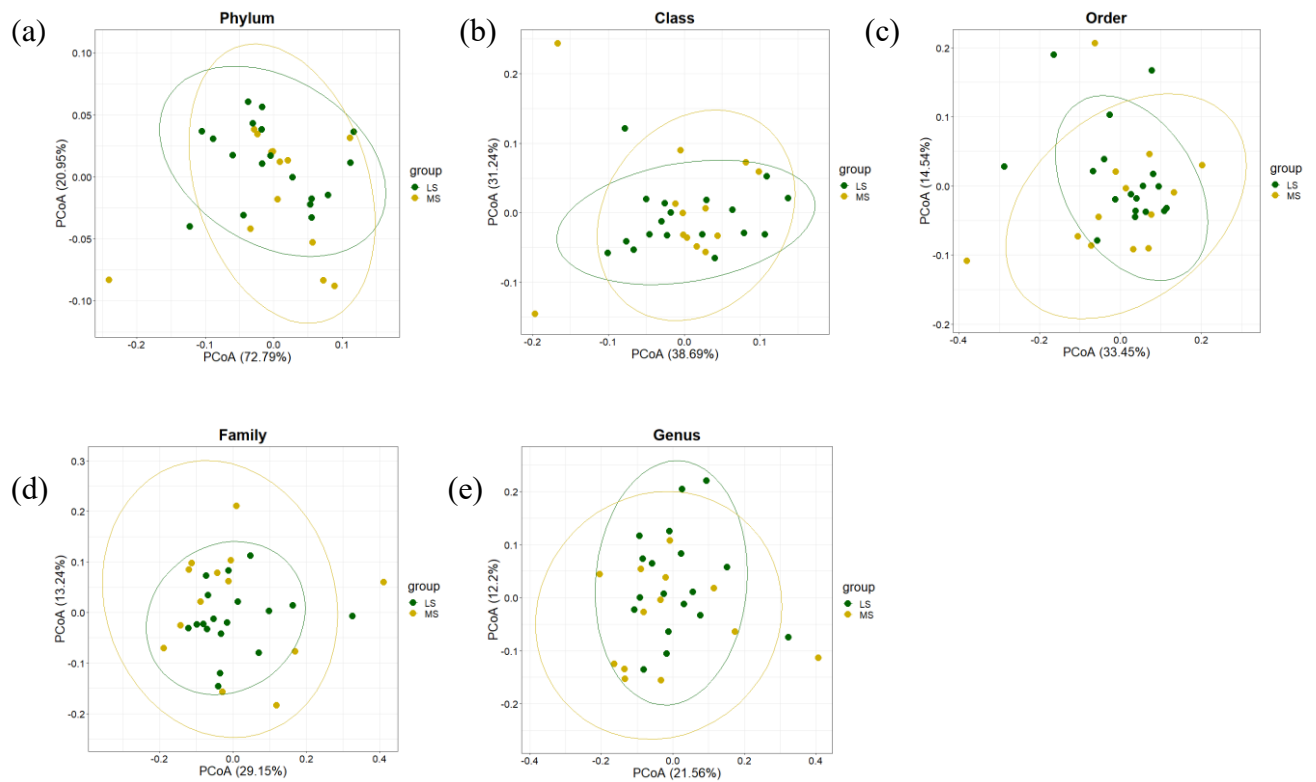

Supplementary Fig.2. Results of Principal coordinates analysis showing the dissimilarity between samples at different classification levels. (a) Phylum level (b) Class level (c) Order level (d) family level (e) genus level
